1           **EcoFun-MAP: An Ecological Function Oriented Metagenomic Analysis Pipeline**

2           Zhou Jason Shi<sup>1,2,3</sup>, Naijia Xiao<sup>1</sup>, Daliang Ning<sup>1</sup>, Renmao Tian<sup>1</sup>, Ping Zhang<sup>1</sup>, Daniel Curtis<sup>1</sup>,  
3           Joy D. Van Nostrand<sup>1</sup>, Liyou Wu<sup>1</sup>, Terry C. Hazen<sup>4,5</sup>, Andrea M. Rocha<sup>5</sup>, Zhili He<sup>6</sup>, Adam P.  
4           Arkin<sup>7,8</sup> and Mary K. Firestone<sup>9</sup> and Jizhong Zhou<sup>1,10,11\*</sup>

5

6           <sup>1</sup>Institute for Environmental Genomics and Dept. Microbiology and Plant Biology, University of  
7           Oklahoma, Norman, OK, USA.

8           <sup>2</sup>Data Science, Chan Zuckerberg Biohub, San Francisco, CA, USA

9           <sup>3</sup>Data Science and Biotechnology, Gladstone Institutes, San Francisco, CA, USA

10          <sup>4</sup>Department of Earth and Planetary Sciences, Department of Microbiology, Department of Civil  
11          and Environmental Sciences, and Institute for a Secure and Sustainable Environment, University  
12          of Tennessee, Knoxville, TN, USA.

13          <sup>5</sup>Biosciences Division, Oak Ridge National Laboratory, Oak Ridge, TN, USA.

14          <sup>6</sup>School of Environmental Science and Engineering, Environmental Microbiomics Research  
15          Center, Sun Yat-sen University, Guangzhou, China.

16          <sup>7</sup>Environmental Genomics & Systems Biology Division, Lawrence Berkeley National  
17          Laboratory, Berkeley, CA, USA

18          <sup>8</sup>Department of Bioengineering, University of California at Berkeley, Berkeley, CA, USA

19          <sup>9</sup>Department of Environmental Science, Policy, and Management, University of California,  
20          Berkeley, CA, USA

21          <sup>10</sup>Earth and Environmental Sciences, Lawrence Berkeley National Laboratory, Berkeley, CA,  
22          USA.

23          <sup>11</sup> School of Civil Engineering and Environmental Sciences, University of Oklahoma, Norman,  
24          OK, USA.

25

26 \* Corresponding author: Jizhong Zhou, [jzhou@ou.edu](mailto:jzhou@ou.edu)

27

28 **Conflict of Interest** The authors declare no conflict of interest.

29 **Abstract:**

30 Annotating ecological functions of environmental metagenomes is challenging due to a lack of  
31 specialized reference databases and computational barriers. Here we present the **Ecological**  
32 **Function oriented Metagenomic Analysis Pipeline (EcoFun-MAP)** for efficient analysis of  
33 shotgun metagenomes in the context of ecological functions. We manually curated a reference  
34 database of EcoFun-MAP which is used for GeoChip design. This database included ~1,500  
35 functional gene families that were catalogued by important ecological functions, such as carbon,  
36 nitrogen, phosphorus, and sulfur cycling, metal homeostasis, stress responses, organic  
37 contaminant degradation, antibiotic resistance, microbial defense, electron transfer, virulence and  
38 plant growth promotion. EcoFun-MAP has five optional workflows from ultra-fast to ultra-  
39 conservative, fitting different research needs from functional gene exploration to stringent  
40 comparison. The pipeline is deployed on High Performance Computing (HPC) infrastructure  
41 with a highly accessible web-based interface. We showed that EcoFun-MAP is accurate and can  
42 process multi-million short reads in a minute. We applied EcoFun-MAP to analyze metagenomes  
43 from groundwater samples and revealed interesting insights of microbial functional traits in  
44 response to contaminations. EcoFun-MAP is available as a public web server at  
45 <http://iegst1.rccc.ou.edu:8080/ecofunmap/>.

46

47 **Keywords:** Metagenomic sequencing; Functional gene; Ecological functions; Pipeline; High  
48 Performance Computing.

## 49 **Introduction**

50 High throughput sequencing (HTS) and associated genomic technologies have revolutionized  
51 microbial ecology studies<sup>1-5</sup> in the past decade. It allows in-depth profiling of microbial  
52 communities from environmental samples and leads to novel insights into microbial species,  
53 metabolic functions and pathways<sup>6-8</sup>. Shotgun metagenomic sequencing is one major application  
54 of HTS technology for microbial ecology studies<sup>9</sup>. It randomly recovers short or long reads from  
55 metagenomes, avoids selective amplification and thus several related biases and limitations in  
56 amplicon sequencing<sup>10-12</sup>, and has the potential to accurately quantify the abundances of both  
57 microbial taxa and functional genes<sup>13</sup>.

58 Shotgun metagenomic sequencing often generates a large volume of data and requires  
59 intensive complicated computational analysis to survey a typical environmental metagenome,  
60 e.g. soil metagenome. To meet the data analysis needs, many computational resources have been  
61 made available. Those resources have three main categories, including standalone programs for  
62 individual steps (e.g. quality control<sup>14-16</sup>, assembly<sup>17,18</sup>, gene prediction<sup>19,20</sup>, and sequence  
63 alignment<sup>21-23</sup>, reference databases<sup>24-28</sup> and integrated analysis pipelines<sup>29-32</sup>).

64 Regardless of the available resources, we still face challenges for annotating functional genes  
65 of metagenomes that are ecologically important. First, most reference databases, e.g., NCBI nr,  
66 are for general purpose and lack focus on ecological functions. Using those databases without  
67 further filtration/distillation could result in unnecessary computing and data interpretation  
68 difficulties. Second, lack of computing skills and advanced hardware resources is still prevalent  
69 among microbial ecologists, which hinders the use of standalone programs and databases,  
70 especially those with complex interfaces and insufficient documentation. Integrated analysis  
71 pipelines, particularly web-based applications, which provide universal access and require little

72 computing skills, are uniquely positioned to address this challenge. Nevertheless, few pipelines  
73 of such are available, efficient or ecology-oriented.

74 Here we developed an **Ecological Function oriented Metagenomics Analysis Pipeline**  
75 (EcoFun-MAP), which uses a gene-centric paradigm to ease functional analysis of metagenomes.  
76 We manually curated the reference database of EcoFun-MAP by selecting and categorizing a  
77 comprehensive collection of microbial genes that were important to ecological functions and  
78 geochemical processes, which are used to design comprehensive GeoChip – a high throughput  
79 array-based technology for dissecting microbial community functions important to  
80 biogeochemistry, ecology, environmental sciences, agriculture, as well as human health<sup>33–36</sup>. The  
81 database included both relevant nucleotide and amino acid sequences, and hidden Markov  
82 models that are necessary for computing facilitation. EcoFun-MAP is also designed with several  
83 distinct data analysis workflows and evaluated for both speed and accuracy. To promote  
84 efficiency and accessibility, EcoFun-MAP was deployed on High-Performance Computing  
85 (HPC) infrastructure with a web-based user interface. In addition, we applied EcoFun-MAP to  
86 analyze metagenomes from groundwater samples and demonstrated its high effectiveness in  
87 revealing compositional variations of relevant functional genes along the contamination gradient.

88

## 89 **Results**

### 90 **Overview of EcoFun-MAP**

91 EcoFun-MAP is a fully automated pipeline that performs efficient functional gene annotation of  
92 sequencing reads from shotgun metagenomes. It consists of a reference database of functional  
93 genes and several computing workflows for gene annotation.

94 The reference database of EcoFun-MAP has four main modules, including a DIAMOND<sup>23</sup>  
95 index of seed sequences (EFM-DI-DB-S), gene family Hidden Markov Models (EFM-HMM-  
96 DB), a DIAMOND (EFM-DI-DB-R) and NCBI-BLAST<sup>37</sup> (EFM-BLAST-DB) index of full  
97 sequences (Fig. 1). To build these modules, we first manually selected the protein seed  
98 sequences for all functional gene families, which are pooled to make the EFM-DI-DB-S. We  
99 aligned seed sequences of each functional gene family and used the resulting multiple sequence  
100 alignment to build the EFM-HMM-DB. Both EFM-DI-DB-R and EFM-BLAST-DB modules use  
101 full reference sequences rather than the seed sequences only. We downloaded a large number of  
102 candidate sequences with keyword-based queries from NCBI GenBank<sup>25</sup>. Although our queries  
103 were crafted carefully, there might still be some false sequences in the candidate sequences due  
104 to possible mis-annotations. To exclude these false sequences, we used an iterative HMM  
105 searching procedure, which has the following steps: (i) set up an initial e-value cutoff = 10, (ii)  
106 searching the candidate sequences against the EFM-HMM-DB using the e-value cutoff, (iii)  
107 manually evaluate the resulting candidate sequences passed the cutoff, and (iv) if needed, adjust  
108 e-value cutoff and repeating the procedure. Since candidate sequence and HMM model quality  
109 varies, the best cutoff for each gene family differs from each other, and a rigorous manual  
110 validation is critical to ensure the quality of reference sequences. In addition, we clustered the  
111 reference sequences of each gene family into Functional Clusters (fClusters) based on the  
112 sequence similarity (95%), which allows further stratification of annotated reads by the same or  
113 highly related species.

114 The reference database of EcoFun-MAP covered a total of 17 major functional gene  
115 categories and 160 primary subcategories (Table 1), which provides a comprehensive collection  
116 of functional genes that are important to biogeochemistry, ecology, environmental science,

117 agriculture, and public health. For all 1,491 functional gene families included, we selected  
118 14,500 seed sequences and built 1,862 HMM models. Meanwhile, a total of 1,217,363 reference  
119 functional gene sequences were retrieved and manually validated using the iterative HMM  
120 searching, which originated from about 50,000 taxonomical units that were distinguishable based  
121 on their taxonomical IDs. Based on these sequences, 280,247 fClusters were generated and  
122 further incorporated in EcoFun-MAP. Details about the coverage of EcoFun-MAP can be found  
123 in Table S1.

124 To fully take advantage of the reference database of EcoFun-MAP, we implemented a total  
125 of five workflows, which were labeled as ultra-fast, fast, moderate, conservative, and ultra-  
126 conservative (Fig. 2), respectively. All of the workflows used the same preprocessing procedure  
127 for quality trimming and gene prediction, in which the bases of low quality or ambiguity and  
128 excessively short reads were removed and gene fragments from qualified reads were identified.  
129 These workflows then diverge in the downstream analysis. In the ultra-fast workflow,  
130 preprocessed reads were directly searched against the EFM-DI-DB-S database. The fast  
131 workflow extended the ultra-fast workflow by further searching the EFM-DI-DB-S annotated  
132 reads against the EFM-HMM-DB and the EFM-BLAST-DB sequentially. Similarly, in the  
133 moderate workflow, the preprocessed reads were directly searched against the EFM-DI-DB-R.  
134 The conservative workflow extended the moderate by further searching the EFM-DI-DB-R  
135 annotated reads against the EFM-HMM-DB and then searching the resulting reads against the  
136 EFM-BLAST-DB. Finally, in the ultra-conservative workflow, the preprocessed reads were first  
137 searched against the EFM-HMM-DB, and then the resulting reads were searched against the  
138 EFM-BLAST-DB. In the end, all workflows provided an optional step to normalize counts of  
139 hits based on the average length of reference sequences from the gene families of the hits. Due to

140 all these differences, the workflows should provide disparate performance in terms of both speed  
141 and accuracy, therefore allowing needed flexibility for data analysis in practice.

### 142 **Computing speed evaluation of EcoFun-MAP**

143 To fully evaluate the computing speed of EcoFun-MAP in relation to input data size, we  
144 arbitrarily selected a groundwater sample (FW300), downsized it to subsamples of 0.7M, 3.5M,  
145 7M, 35M and 70M reads, which accounted for ~100M, ~500M, ~1G, ~5G and ~10G bases, and  
146 then ran all five EcoFun-MAP workflows on these subsamples. Each workflow was run with the  
147 same hardware configuration (10 nodes and 4 cores on each) and parameters. According to the  
148 design, we expected that the speed of the workflows should be ultra-fast > moderate > fast >  
149 conservative > ultra-conservative.

150 As expected, the ultra-fast workflow had the fastest speed, which was finished running on the  
151 largest subsample (70M reads) in 1,027 seconds (s), and then was followed by moderate (1,145  
152 s), fast (1,506 s), conservative (1,865 s) and ultra-conservative (7,341 s) in order of decreasing  
153 speed (Table 2). The running of workflows on the largest subsample yielded the highest speed  
154 for all workflows (~0.6-4.1M reads/min.), and the speed of workflows increased as the data size  
155 went up. The running on the smallest subsample yielded the lowest speed for all workflows  
156 (~0.2-0.7M reads/min.). The ultra-fast workflow is >7 times faster compared to the ultra-  
157 conservative workflow for the largest subsample, but only 3 times faster for the smallest  
158 subsample in our test. Together these results suggest that EcoFun-MAP is fast (average speed  
159 from ~0.4 to ~2.5 M reads/min.) and highly scalable in high-throughput sequencing data  
160 analysis, in which time cost is expected to increase less than linearly as data size hikes, because  
161 of the increases of speed.



## 162 **Accuracy evaluation of EcoFun-MAP**

163 Next, we evaluated the accuracy of EcoFun-MAP in terms of sensitivity and precision. Since the  
164 ground truth of gene annotation is not accessible for the metagenomes, direct estimation of  
165 accuracy is not possible. Here we used the annotation resulting from the ultra-conservative  
166 workflow as the ground truth to compare accuracy between the other four workflows, because  
167 the ultra-conservative workflow (i) performs homolog based search for every read, which takes  
168 into account information about protein domain structure and thus is considered to be more  
169 accurate than read mapping based only on sequence identity, and (ii) utilizes probabilistic models  
170 built on multiple sequence alignments and is thus generally more capable of detecting remote  
171 homologs than similarity search. By this definition, true positives (TP) of a workflow are the  
172 reads annotated by both the workflow and the ultra-conservative workflow; sensitivity is  $TP /$   
173  $total\ ultra-conservative\ annotations$ ; precision is  $TP / total\ reads\ annotated\ by\ the\ evaluated$   
174  $workflow$ . We further defined precision and sensitivity at four category levels, based on TP reads  
175 within the same gene, secondary subcategory, primary subcategory or category as ultra-  
176 conservative annotations, respectively.

177 We ran all EcoFun-MAP workflows on the data from the 12 groundwater samples and  
178 compared their precision and sensitivity. The results (Table S2) showed that the numbers of hits  
179 produced by different workflows were ranged from ~2.1 million (0.12%; moderate) to ~81.1  
180 million (4.46%; fast). Fast workflow produced the most hits of all (3.35-6.58%) across all  
181 samples, the moderate workflow produced the least (0.06-0.27%), and the conservative  
182 workflow had very similar yield (0.07-0.34%) as the ultra-conservative workflow (Table S2).  
183 For evaluated workflows, sensitivity rates (Table 3) were high in general (~70% above). Fast  
184 workflow had the highest sensitivity rate at all levels (85.4- 91.9%), which was then followed by

185 conservative and ultra-fast workflow, and moderate workflow had the lowest (69.3%-69.8%)  
186 (Table 3). Differences of sensitivity rate across four annotation category levels (i.e., primary  
187 category, secondary category, gene family and gene) were small ( $< 0.5\%$ ) for moderate and  
188 conservative workflows, and higher in the ultra-fast ( $\sim 7.4\%$ ) and fast workflows ( $\sim 6.5\%$ ).  
189 Precision rate is the highest for moderate workflow at all levels (87.0-87.5%), but quite low for  
190 both fast (2.8-3.1%) and ultra-fast workflow (8.1-8.9%); with small variation across category  
191 levels ( $< 0.5\%$ ) for all workflows (Table 3). We note that the low precision of fast and ultra-fast  
192 workflow is mostly due to more reads were annotated by these two workflows, and those  
193 annotations not found by ultra-conservative workflow are not necessarily false positives.  
194 Together, the results suggest that EcoFun-MAP workflows should be chosen with consideration  
195 for distinct applications, e.g., fast and ultra-fast workflow for open gene search; conservative or  
196 ultra-conservative for stringent comparative analyses.

197

### 198 **Application to groundwater metagenomic analysis**

199 To demonstrate the effectiveness of EcoFun-MAP in analyzing metagenomes, we ran all five  
200 workflows on a total of 12 groundwater samples collected from the Oak Ridge Integrated Field  
201 Research Challenge site<sup>38,39</sup>. These samples have labels including background (L0), low- (L1),  
202 intermediate- (L2), and high-contamination (L3), where  $L0 < L1 < L2 < L3$  in terms of  
203 contamination level. SEED Subsystem annotation of these samples is also performed for  
204 comparison. Microbial community functional gene compositions were compared among the  
205 samples as shown in the DCA ordination plots (Figure. 4). The ordination results were consistent  
206 among all workflows. Samples from group L3 were observed to separate from other groups in all  
207 workflows with relatively high within-group distances. Clear separation of L2 samples from

208 other groups was found in the moderate, conservative, and ultra-conservative workflows (Figure  
209 4c, d and e). Clear separation of all four groups from each other was only observed in results  
210 based on the ultra-conservative workflow (Figure. 4e).

211 The functional gene richness from different workflows showed similar trends along the  
212 contamination gradient. The richness was significantly lower ( $p < 0.05$ ) in L3 samples than in L0  
213 samples, which was shown in analyses based on all EcoFun-MAP workflows and SEED  
214 Subsystem annotation. The analyses based on the fast workflow and SEED Subsystem<sup>28</sup>  
215 annotation also showed a significantly lower ( $p < 0.05$ ) richness of functional genes in L3  
216 samples than in L2 samples. However, results from different workflows showed various  
217 estimations of richness changes. The ultra-fast and fast workflows estimated that richness of  
218 functional genes was ~12% lower in L3 samples than in L1 samples, the moderate, conservative,  
219 and ultra-conservative workflows estimated that the richness of functional genes were ~24% to  
220 ~25% lower, and the SEED Subsystem annotation estimated that it was only ~2.8% lower.  
221 Meanwhile, the fast workflow estimated that the richness of functional genes was ~8.4% lower  
222 in L3 samples than in L2 samples, and SEED Subsystem annotation estimated ~2.3% of lower  
223 richness. The results above suggest all workflows of EcoFun-MAP are capable of characterizing  
224 community-wide variations in groundwater metagenomes under the contamination gradient, with  
225 higher sensitivity compared to the SEED Subsystem annotations. This is probably because the  
226 SEED annotations include many universal physiological functions and genes which are less  
227 variable.

228 Next, we further analyzed relative abundances of major functional categories, including the  
229 category of C, N, S and P cycling, Metal homeostasis, Stress, Organic contaminant degradation,  
230 Antibiotic resistance, and Electron transfer, which are considered to be highly relevant to the

231 study site, and compared them between different samples. The analysis was based on the ultra-  
232 conservative workflow. Relative abundances of functional genes from the C cycling category  
233 were lower in two of L3 samples (FW106 and FW021), which are two samples with the highest  
234 level of contamination in many heavy metals (e.g., Cr, Eu and Ce) (Figure S3), and those from  
235 the metal homeostasis category in the two samples were higher than other samples (Figure S4).  
236 Interestingly, sample FW104 from group L3, which had the highest level of Sulfate (SO<sub>4</sub>) of all  
237 samples (Figure S3), also has the highest relative abundance of S cycling genes (Figure S4).  
238 Response ratios (rr) of functional genes were calculated for comparing their relative abundances  
239 between sample group L0 and each of other groups (L1, L2 and L3). Among all genes with  
240 significant response ratios, we found abundances of homeostasis genes were significantly higher  
241 in L2 than L0 (*arrA* and *arxA*; rr=3.41 and 4.8) and in L3 than L0 (*corC*, *pcoA*, *mgtA* and *merP*;  
242 rr = 1.09-5.38), and abundance of one C degradation gene (*ara*) was significantly lower (rr = -  
243 2.07) in L3 than L0 (Figure. 6). Meanwhile, a denitrification gene (*nirK*) was found to be more  
244 significantly abundant (rr = 1.76) in L3 than L0, which suggested a microbial response to higher  
245 nitrate concentrations in the L3 samples (Figure S3). Two oxygen-limitation-response genes,  
246 *narH* and *narJ*, from Stress category were more abundant (rr = 2.97 and 2.76) in L3 samples  
247 (DO=0.13-0.27) than L0 samples (DO=0.28-0.71), which suggested microbial response to low  
248 dissolved oxygen in highly contaminated wells.

249

## 250 **Discussion**

251 EcoFun-MAP provides an efficient and accessible tool for analyzing shotgun metagenomic  
252 sequencing data from the perspective of ecological functions. With the typical speed of analysis

253 from ~0.6 to ~4.1M reads/min, it helps overcome the computing barriers associated with deep  
254 functional profiling of microbes in a variety of environments.

255 The high computing efficiency of EcoFun-MAP is due to several reasons. First, the reference  
256 database is built, cleaned and optimized with a clear focus and much smaller in size compared to  
257 other general databases. With our curation efforts, the EcoFun-MAP database only has 1.5% of  
258 the size of NCBI RefSeq database (81,027,309 protein sequences; Mar 13th, 2017) while still  
259 provides a comprehensive coverage of keys genes from important ecological functions and  
260 geochemical processes. Such reduction strategy has been shown a useful solution for speeding up  
261 high-throughput sequencing data analysis<sup>40</sup>. Second, fast tools were selected for EcoFun-MAP  
262 and contributed substantially to the speed of EcoFun-MAP. For example, FragGeneScan+ used  
263 for gene prediction is 5-50 times faster than FragGeneScan at no cost of accuracy<sup>41</sup>. HMMER 3  
264 is 100-1000 times faster than HMMER 2<sup>42</sup>. DIAMOND can be 20,000 times faster than  
265 BLASTX<sup>23</sup>. Third, EcoFun-MAP can process metagenomes in parallel and is deployed on an  
266 HPC cluster, which gains additional acceleration from advanced hardware. In addition to  
267 computing speed, EcoFun-MAP is also highly scalable, which is quite important since the  
268 volume of sequencing data continues to increase.

269 The reference database of EcoFun-MAP also has several unique features and advantages.  
270 First, the database has a clear microbial ecology focus compared to other recent tools annotating  
271 metagenomes with general metabolic genes, e.g., DRAM<sup>43</sup> and METABOLIC<sup>44</sup>. The gene  
272 families were manually categorized into a hierarchical system that is similar as GeoChip<sup>33-36</sup>,  
273 which has been demonstrated consistently effective and easy to interpret in microbial ecology  
274 studies. Compared to FunGene<sup>45</sup>, a latest tool with a similar ecological focus, EcoFun-MAP  
275 covers 18 times more functional gene families as well as additional important function

276 categories, e.g., stress response and virulence. Second, the reference sequences of each  
277 functional gene were clustered (fClusters), which provide a resolution beyond gene family and  
278 allow stratified analysis by groups of closely related microorganisms. In addition, EcoFun-MAP  
279 offers distinct database modules in a widely accepted format, e.g., HMM models. These modules  
280 enable speed and accuracy adjustment, underlie flexibility for different applications, and are easy  
281 to adapt for future tools and to extend for new genes and sequences. In the future, we will  
282 continue to maintain and update EcoFun-MAP databases as new knowledge (e.g. metagenome  
283 assembled genomes and genes<sup>6,7,46-49</sup>) comes in as well as exploring rapid algorithms (e.g. k-mer  
284 exact match<sup>50-52</sup>) for further speedup.

285       Apart from software tools like DRAM and METABOLIC, EcoFun-MAP is open for public  
286 use in the form of a website, so it is free of installation and configuration of dependencies or  
287 databases, and can be accessed using plain web browsers easily with Internet connection. While  
288 EcoFun-MAP was implemented and deployed based on advanced hardware and sophisticated  
289 bioinformatics tools, it requires little computer skills to use other than simple web-based user  
290 registration, uploading of datasets, and workflow selection or parameter setting. EcoFun-MAP is  
291 supported by an HPC infrastructure with fast CPUs, large memory, and hard disk space for  
292 public use. We consider this setup is ideal for data-intensive projects in microbial ecology and  
293 EcoFun-MAP should be highly accessible and usable to microbial ecologists in practice.

294       While the accuracy of EcoFun-MAP is difficult to directly evaluate, we adopted several ways  
295 to ensure that it is accurate. First, the reference database of EcoFun-MAP is rigorously curated,  
296 which ensures analysis quality at the beginning. Second, we used an iterative procedure to  
297 generate HMMs in EcoFun-MAP and manually tuned a key parameter (e.g., e-value cutoff of  
298 HMM search) per gene family, which should be more accurate compared to using an arbitrary or

299 single universal parameter. In addition, EcoFun-MAP provides multiple predefined workflows  
300 accommodating disparate applications. The sensitivity is generally high for all workflows  
301 (~70%). The ultra-fast and fast workflows showed low precision due to read identity-based  
302 searches, but are still useful for explorative analyses where detections with strong evidence are  
303 not mandatory. For example, we recommend the ultra-fast and fast workflow for discovering  
304 novel genes or gene fragments. Reassuringly, all EcoFun-MAP workflows revealed similar  
305 trends in the analysis of metagenomes from groundwater samples. Since the conservative  
306 workflow had both high sensitivity (~85%) and precision (~86%) rate, as well as speed (1.2M  
307 reads/min. on average), we set it to the default mode for EcoFun-MAP.

### 308 **Conclusion and availability**

309 In this study, we developed EcoFun-MAP for functional analysis of shotgun metagenomic  
310 sequencing data from microbial ecology. EcoFun-MAP consists of references databases  
311 constructed with selective coverage of genes that are important to ecological functions, and  
312 multiple workflows for addressing disparate needs for speed and accuracy. Furthermore,  
313 EcoFun-MAP was implemented on the basis of High-Performance Computing (HPC)  
314 infrastructure with high accessible interfaces. Our analysis indicated that EcoFun-MAP is a fast  
315 and powerful pipeline for shotgun metagenome sequence data. EcoFun-MAP is open for public  
316 use and can be found available at our website: <http://iegst1.rccc.ou.edu:8080/ecofunmap/>.

### 317 **Material and Methods**

#### 318 **Selection of functional categories and genes**

319 We limited the applicable scope of EcoFun-MAP to general microbial ecology studies and  
320 selected a total of 17 major categories (Table 1) of microbial genes that are associated with  
321 geochemical processes and ecological functions. These genes have been on functional gene

322 arrays or GeoChip<sup>33-36</sup>, including Carbon (C), Nitrogen (N), Sulfur (S), and Phosphorus (P)  
323 cycling, antibiotic resistance, organic contaminant degradation, metal homeostasis, stress  
324 response, microbial defense, electron transferring, plant growth promotion, virulence, protists,  
325 viruses and others (metabolic pathways, pigment biosynthesis and *gyrB*). Then the functional  
326 genes are further divided into subcategories, yielding a three to four-level hierarchical  
327 organization: major category, primary subcategory, secondary category (optional), and functional  
328 gene. For example (Figure S1), the C cycling category (144 genes) consists of three primary  
329 subcategories, including C degradation (60 genes), C fixation (61 genes) and Methane (23  
330 genes). The primary subcategory of C degradation has 18 secondary subcategories (e.g., Starch  
331 degradation, Cellulose degradation and Lignin degradation), the C fixation has 8 secondary  
332 subcategories (e.g., Calvin cycle, Dicarboxylate/4-hydroxybutyrate cycle and 3-  
333 hydroxypropionate bicycle), and the Methane has two secondary subcategories (i.e., Methane  
334 oxidation and Methanogenesis). Each secondary subcategory has the number of genes ranging  
335 from 1 to 21 (Figure S1).

### 336 **Retrieval of functional gene sequences**

337 National Center for Biotechnology Information (NCBI) Entrez databases<sup>53</sup> were used as the  
338 source to retrieve functional gene sequences for constructing EcoFun-MAP databases based on  
339 GeoChip databases. We manually crafted a keyword-based query for each functional gene, and  
340 submitted it programmatically to the Entrez databases to search and retrieve both protein and  
341 nucleotide candidate sequences via Entrez Programming Utilities (E-utilities)<sup>53</sup>. A typical search  
342 query is designed to consist of all aliases and variants names of the corresponding gene known to  
343 us, as well as other NCBI search constraints (e.g., organism), braces and logic operators (e.g.,  
344 AND, OR and NOT). By carefully crafting the keyword-based query, the relevancy of research



345 results can be improved as the number of the results drop, improving initial quality control  
346 before EcoFun-MAP database construction and reducing computational cost for later processing.  
347 For example, a keyword-based query for *nifH* gene (Suppl. Fig. 2) has returned 34,077  
348 nucleotide records and 31,522 protein records, which were much less than 100,728 nucleotide  
349 records and 82,722 protein records in total returned by simply using "nifH" as the search query  
350 (retrieval test date: Jan. 23<sup>rd</sup>, 2017), and successfully excluded irrelevant records, such as  
351 *Sinorhizobium sp.* partial *nodA* gene (accession number: Z95242.1) and *Heliobacterium gestii*  
352 partial *anfH* gene (accession number: AB100834.1). Next, from records retrieved using  
353 keyword-based query search, a minimum of 1 to a few hundred seed sequences were selected  
354 manually on the basis of two criteria: (i) seed sequences must be experimentally confirmed in  
355 literature, and (ii) seed sequences must be distinctive from each other. Finally, redundant records  
356 (i.e., records with identical GenBank ID and description) were removed. To this end, candidate  
357 sequences and seed sequences have been prepared for each selected EcoFun-MAP gene and are  
358 ready for EcoFun-MAP database construction.

359

### 360 **Building EcoFun-MAP reference database**

361 Reference database of EcoFun-MAP was built using the aforementioned candidate and seed  
362 sequences. The building process involves several key steps, including seed sequence alignment,  
363 HMM building, HMM searching, sequence clustering, DIAMOND index building and BLAST  
364 index building were implemented using ClustalW<sup>54</sup>, hmmbuild (HMMER3<sup>42</sup>), hmmsearch  
365 (HMMER3), CD-HIT<sup>55</sup>, DIAMOND and MAKEBLASTDB<sup>37</sup>, respectively. All of these tools  
366 were used with default parameters, except the CD-HIT used a customized threshold of clustering  
367 similarity at 95%.

## 368 **Design of EcoFun-MAP workflows**

369 For the workflows, the key processing steps, including quality trimming, gene predicting, HMM  
370 searching, DIAMOND index searching and BLAST index searching were implemented using  
371 Btrim, FragGeneScan+, hmmsearch (HMMER3), DIAMOND and BLASTN, respectively. The  
372 workflows have preset parameters for each step, and can also accept users' changes on the  
373 parameters for meeting specific speed or accuracy needs. For example, the Btrim used in the  
374 quality trimming for all the workflows has two major parameters: moving window size and  
375 average quality cutoff within the window. The default moving window size was set to 5 and the  
376 default average quality cutoff was set to 20 by EcoFun-MAP, but users can lower the moving  
377 window size or set higher the average quality cutoff to increase the quality of trimmed reads. All  
378 analyses in this study used preset parameters unless otherwise was mentioned.

## 379 **Deployment of EcoFun-MAP on HPC**

380 The databases and workflows of EcoFun-MAP were deployed on an HPC cluster with a web-  
381 based Graphic User Interface (GUI) for access and job submission (Fig. 3). A single EcoFun-  
382 MAP job submission requires at the beginning a data file and all parameters that will be used for  
383 the selected workflow. EcoFun-MAP provides an FTP application for data file transferring and  
384 an HTTP application (website) to accept parameter settings. After being submitted, a job will be  
385 sent to the HPC cluster in a "first in, first out" (FIFO) order for further EcoFun-MAP processing.  
386 When executing a job, the HPC cluster will (i) break down the job into small pieces, (ii) map job  
387 pieces to available nodes, (iii) run the selected workflow for the pieces in parallel, and (iv)  
388 collect and reduce outputs of all pieces, and prepare final result for downloading by the job  
389 submitter. The implementation of EcoFun-MAP depends on both open-source software and in-  
390 house scripts. The FTP application was provided on the basis of installation and configuration of

391 vsftpd (version 3.0.3). The parameter submission website was built using Django (version  
392 1.11.5), In-house Perl, Python, Shell and SLURM job scheduling scripts were also used  
393 throughout EcoFun-MAP implementation. Their major functions or roles included the following:  
394 (i) job management, (ii) calling or executing bioinformatics tools, (iii) data file format  
395 conversion (e.g., convert FASTQ formatted file into a FASTA one), (iv) breaking down,  
396 mapping and reducing dataset and (v) data I/O and transferring. At last, the HPC cluster hosting  
397 EcoFun-MAP currently has two types (type I and type II) of computing nodes, and each type has  
398 5 nodes, which consists of a total of 10 nodes for handling EcoFun-MAP tasks. The type I node  
399 has 24 cores and 64GB RAM, and the type II node has 24 cores and 128GB RAM. The HPC  
400 cluster also provides 128TB hard disk space for temporal storage of input, intermediate data and  
401 result from tasks of EcoFun-MAP.

#### 402 **Experimental datasets**

403 Experimental datasets for showcasing and evaluating EcoFun-MAP were sequenced from  
404 groundwater samples from the Oak Ridge Integrated Field Research Challenge site<sup>38</sup> (OR-IFRC;  
405 Oak Ridge, TN). The OR-IFRC site has gradients of salinity, pH and contaminants including  
406 Uranium, nitrate, sulfide, and other heavy metals<sup>39,56</sup>. In this study, 20 L groundwater was  
407 collected by 0.2- $\mu$ m-pore-size filter from each of 12 locations under different contamination  
408 levels: background (L0), low- (L1), intermediate- (L2), and high-contamination (L3), with 3  
409 samples for each level. Microbial community DNA was extracted from each sample using a  
410 modification of the Miller method<sup>39,56,57</sup>. The metagenome of each sample was sequenced using  
411 the shotgun method with HiSeq 3000 sequencer (Illumina, San Diego, CA). Upon completing  
412 HiSeq running, quality control was performed on the resulting raw reads. Duplicates and reads  
413 with ambiguous bases (>1) and poor-quality (average score <20) were discarded. Poor-quality

414 bases (quality score <20) were trimmed. Finally, about 1,816.7 million of 150 bp reads were  
415 generated in total, which counted for about 272.5 Gbp data. The data size for each sample ranges  
416 from about 11.9 Gbp (GW199) to about 39.9 Gbp (FW300). More information about HiSeq  
417 output for each sample can be found in supplementary Table S2.

418

## 419 **Acknowledgements**

420 The development of EcoFun-MAP was supported by the US Department of Energy, Office of  
421 Science, Genomic Science Program (Award Number: DE-SC0004601 and DE-SC0010715), and  
422 Office of Biological and Environmental Research's (OBER) Biological Systems Research on the  
423 Role of Microbial Communities in Carbon Cycling program (Award number: DE-SC0004730  
424 and DE-SC001057). The analysis of groundwater samples was supported by ENIGMA-  
425 Ecosystems and Networks Integrated with Genes and Molecular Assemblies  
426 (<http://enigma.lbl.gov>), a Scientific Focus Area Program at Lawrence Berkeley National  
427 Laboratory and is based upon work supported by the U.S. Department of Energy, Office of  
428 Science, Office of Biological & Environmental Research (contract number: DE-AC02-  
429 05CH11231). The development, implementation and maintenance of EcoFun-MAP by N.X. and  
430 D.N. were also partially supported by NSF Grants EF-2025558 and DEB-2129235.

431

432 **References**

- 433 1. Sunagawa, S. *et al.* Structure and function of the global ocean microbiome. *Science* **348**, 1261359  
434 (2015).
- 435 2. Fierer, N. *et al.* Reconstructing the microbial diversity and function of pre-agricultural tallgrass prairie  
436 soils in the United States. *Science* **342**, 621–624 (2013).
- 437 3. Guo, X. *et al.* Climate warming leads to divergent succession of grassland microbial communities. *Nat.*  
438 *Clim. Change* **8**, 813–818 (2018).
- 439 4. Schimel, J. Microbial ecology: Linking omics to biogeochemistry. *Nat. Microbiol.* **1**, 1–2 (2016).
- 440 5. Zhou Jizhong *et al.* High-Throughput Metagenomic Technologies for Complex Microbial Community  
441 Analysis: Open and Closed Formats. *mBio* **6**, e02288-14.
- 442 6. Parks, D. H. *et al.* Recovery of nearly 8,000 metagenome-assembled genomes substantially expands  
443 the tree of life. *Nat. Microbiol.* **2**, 1533–1542 (2017).
- 444 7. Nayfach, S., Shi, Z. J., Seshadri, R., Pollard, K. S. & Kyrpides, N. C. New insights from uncultivated  
445 genomes of the global human gut microbiome. *Nature* **568**, 505–510 (2019).
- 446 8. Crits-Christoph, A., Diamond, S., Butterfield, C. N., Thomas, B. C. & Banfield, J. F. Novel soil bacteria  
447 possess diverse genes for secondary metabolite biosynthesis. *Nature* **558**, 440–444 (2018).
- 448 9. Scholz, M. B., Lo, C.-C. & Chain, P. S. Next generation sequencing and bioinformatic bottlenecks: the  
449 current state of metagenomic data analysis. *Curr. Opin. Biotechnol.* **23**, 9–15 (2012).
- 450 10. Logares, R. *et al.* Metagenomic 16S rDNA I Illumina tags are a powerful alternative to amplicon  
451 sequencing to explore diversity and structure of microbial communities. *Environ. Microbiol.* **16**, 2659–  
452 2671 (2014).
- 453 11. Hong, S., Bunge, J., Leslin, C., Jeon, S. & Epstein, S. S. Polymerase chain reaction primers miss  
454 half of rRNA microbial diversity. *ISME J.* **3**, 1365–1373 (2009).

- 455 12. Sharpton, T. J. *et al.* PhylOTU: a high-throughput procedure quantifies microbial community  
456 diversity and resolves novel taxa from metagenomic data. *PLoS Comput. Biol.* **7**, e1001061 (2011).
- 457 13. Nayfach, S. & Pollard, K. S. Toward accurate and quantitative comparative metagenomics. *Cell*  
458 **166**, 1103–1116 (2016).
- 459 14. Andrews, S. FastQC: a quality control tool for high throughput sequence data. (2010).
- 460 15. Kong, Y. Btrim: a fast, lightweight adapter and quality trimming program for next-generation  
461 sequencing technologies. *Genomics* **98**, 152–153 (2011).
- 462 16. Li, S. & Chou, H.-H. LUCY2: an interactive DNA sequence quality trimming and vector removal  
463 tool. *Bioinformatics* **20**, 2865–2866 (2004).
- 464 17. Peng, Y., Leung, H. C., Yiu, S.-M. & Chin, F. Y. Meta-IDBA: a de Novo assembler for metagenomic  
465 data. *Bioinformatics* **27**, i94–i101 (2011).
- 466 18. Nurk, S., Meleshko, D., Korobeynikov, A. & Pevzner, P. A. metaSPAdes: a new versatile  
467 metagenomic assembler. *Genome Res.* **27**, 824–834 (2017).
- 468 19. Hyatt, D. *et al.* Prodigal: prokaryotic gene recognition and translation initiation site  
469 identification. *BMC Bioinformatics* **11**, 119–119 (2010).
- 470 20. Rho, M., Tang, H. & Ye, Y. FragGeneScan: predicting genes in short and error-prone reads.  
471 *Nucleic Acids Res.* **38**, e191–e191 (2010).
- 472 21. Altschul, S. F. *et al.* Gapped BLAST and PSI-BLAST: a new generation of protein database search  
473 programs. *Nucleic Acids Res.* **25**, 3389–3402 (1997).
- 474 22. Langmead, B. & Salzberg, S. L. Fast gapped-read alignment with Bowtie 2. *Nat. Methods* **9**, 357–  
475 359 (2012).
- 476 23. Buchfink, B., Xie, C. & Huson, D. H. Fast and sensitive protein alignment using DIAMOND. *Nat.*  
477 *Methods* **12**, 59–60 (2015).

- 478 24. Pruitt, K. D., Tatusova, T. & Maglott, D. R. NCBI Reference Sequence (RefSeq): a curated non-  
479 redundant sequence database of genomes, transcripts and proteins. *Nucleic Acids Res.* **33**, D501–  
480 D504 (2005).
- 481 25. Benson, D. A., Karsch-Mizrachi, I., Lipman, D. J., Ostell, J. & Wheeler, D. L. GenBank. *Nucleic*  
482 *Acids Res.* **33**, D34–D38 (2005).
- 483 26. Kanehisa, M. *et al.* KEGG for linking genomes to life and the environment. *Nucleic Acids Res.* **36**,  
484 D480–D484 (2007).
- 485 27. Finn, R. D. *et al.* Pfam: the protein families database. *Nucleic Acids Res.* **42**, D222–D230 (2014).
- 486 28. Overbeek, R. *et al.* The SEED and the Rapid Annotation of microbial genomes using Subsystems  
487 Technology (RAST). *Nucleic Acids Res.* **42**, D206–D214 (2014).
- 488 29. Markowitz, V. M. *et al.* IMG/M 4 version of the integrated metagenome comparative analysis  
489 system. *Nucleic Acids Res.* **42**, D568–D573 (2014).
- 490 30. Glass, E. M., Wilkening, J., Wilke, A., Antonopoulos, D. & Meyer, F. Using the metagenomics  
491 RAST server (MG-RAST) for analyzing shotgun metagenomes. *Cold Spring Harb. Protoc.* **2010**, pdb-  
492 prot5368 (2010).
- 493 31. Seshadri, R., Kravitz, S. A., Smarr, L., Gilna, P. & Frazier, M. CAMERA: a community resource for  
494 metagenomics. *PLoS Biol.* **5**, e75 (2007).
- 495 32. Su, X., Pan, W., Song, B., Xu, J. & Ning, K. Parallel-META 2.0: enhanced metagenomic data  
496 analysis with functional annotation, high performance computing and advanced visualization. *PLoS*  
497 *One* **9**, e89323 (2014).
- 498 33. He, Z. *et al.* GeoChip: a comprehensive microarray for investigating biogeochemical, ecological  
499 and environmental processes. *ISME J.* **1**, 67–77 (2007).
- 500 34. He, Z. *et al.* GeoChip 3.0 as a high-throughput tool for analyzing microbial community  
501 composition, structure and functional activity. *ISME J.* **4**, 1167–1179 (2010).

- 502 35. Tu, Q. *et al.* GeoChip 4: a functional gene-array-based high-throughput environmental  
503 technology for microbial community analysis. *Mol. Ecol. Resour.* **14**, 914–928 (2014).
- 504 36. Shi, Z. *et al.* Functional gene array-based ultrasensitive and quantitative detection of microbial  
505 populations in complex communities. *MSystems* **4**, e00296-19 (2019).
- 506 37. Camacho, C. *et al.* BLAST+: architecture and applications. *BMC Bioinformatics* **10**, 421 (2009).
- 507 38. Hwang, C. *et al.* Bacterial community succession during in situ uranium bioremediation: spatial  
508 similarities along controlled flow paths. *ISME J.* **3**, 47–64 (2009).
- 509 39. Smith, M. B. *et al.* Natural bacterial communities serve as quantitative geochemical biosensors.  
510 *MBio* **6**, e00326-15 (2015).
- 511 40. Silva, G. G. Z., Green, K. T., Dutilh, B. E. & Edwards, R. A. SUPER-FOCUS: a tool for agile functional  
512 analysis of shotgun metagenomic data. *Bioinformatics* **32**, 354–361 (2016).
- 513 41. Kim, D. *et al.* FragGeneScan-Plus for scalable high-throughput short-read open reading frame  
514 prediction. in 1–8 (IEEE, 2015).
- 515 42. Eddy, S. R. Accelerated profile HMM searches. *PLoS Comput. Biol.* **7**, e1002195 (2011).
- 516 43. Shaffer, M. *et al.* DRAM for distilling microbial metabolism to automate the curation of  
517 microbiome function. *Nucleic Acids Res.* **48**, 8883–8900 (2020).
- 518 44. Zhou, Z. *et al.* METABOLIC: high-throughput profiling of microbial genomes for functional traits,  
519 metabolism, biogeochemistry, and community-scale functional networks. *Microbiome* **10**, 33 (2022).
- 520 45. Fish, J. *et al.* FunGene: the functional gene pipeline and repository. *Front. Microbiol.* **4**, (2013).
- 521 46. Almeida, A. *et al.* A new genomic blueprint of the human gut microbiota. *Nature* **568**, 499–504  
522 (2019).
- 523 47. Pasolli, E. *et al.* Extensive Unexplored Human Microbiome Diversity Revealed by Over 150,000  
524 Genomes from Metagenomes Spanning Age, Geography, and Lifestyle. *Cell* **176**, 649-662.e20 (2019).



- 525 48. Almeida, A. *et al.* A unified sequence catalogue of over 280,000 genomes obtained from the  
526 human gut microbiome. *bioRxiv* 762682 (2019) doi:10.1101/762682.
- 527 49. Coelho, L. P. *et al.* Towards the biogeography of prokaryotic genes. *Nature* **601**, 252–256 (2022).
- 528 50. Wood, D. E. & Salzberg, S. L. Kraken: ultrafast metagenomic sequence classification using exact  
529 alignments. *Genome Biol.* **15**, R46 (2014).
- 530 51. Breitwieser, F. P., Baker, D. N. & Salzberg, S. L. KrakenUniq: confident and fast metagenomics  
531 classification using unique k-mer counts. *Genome Biol.* **19**, 198 (2018).
- 532 52. Shi, Z. J., Dimitrov, B., Zhao, C., Nayfach, S. & Pollard, K. S. Fast and accurate metagenotyping of  
533 the human gut microbiome with GT-Pro. *Nat. Biotechnol.* 1–10 (2021).
- 534 53. Wheeler, D. L. *et al.* Database resources of the national center for biotechnology information.  
535 *Nucleic Acids Res.* **36**, D13–D21 (2007).
- 536 54. Li, K.-B. ClustalW-MPI: ClustalW analysis using distributed and parallel computing. *Bioinformatics*  
537 **19**, 1585–1586 (2003).
- 538 55. Li, W. & Godzik, A. Cd-hit: a fast program for clustering and comparing large sets of protein or  
539 nucleotide sequences. *Bioinformatics* **22**, 1658–1659 (2006).
- 540 56. He, Z. *et al.* Microbial functional gene diversity predicts groundwater contamination and  
541 ecosystem functioning. *MBio* **9**, e02435-17 (2018).
- 542 57. Hazen, T. C. *et al.* Deep-sea oil plume enriches indigenous oil-degrading bacteria. *Science* **330**,  
543 204–208 (2010).
- 544
- 545

546 **Figure Legends**

547 **Figure 1.** The flowchart of construction of databases/datasets in the development of EcoFun-  
548 MAP. Cylinders represent starting (green), intermediate (blue) and ending (orange) databases.  
549 Grey rectangles represent processing steps in construction, which take the content of databases or  
550 output of immediate upstream processing steps as input for processing. Four database modules  
551 have been constructed for EcoFun-MAP with the flowchart: a seed sequence-based DIAMOND  
552 index (EFM-DI-DB-S), Hidden Markov Models (HMMs) (EFM-HMM-DB), a functional gene  
553 reference sequence-based DIAMOND index (EFM-DI-DB-R) and a functional gene reference  
554 sequence based NCBI-BLAST index (EFM-BLAST-DB).

555 **Figure 2.** The flowchart of five workflows in EcoFun-MAP, which include ultra-fast (green  
556 background), fast (purple background), moderate (cyan background), conservative (yellowgreen  
557 background), and ultra-conservative (red background). The preprocessing steps are on the grey  
558 ground. Cylinders represent starting (green), intermediate (blue) and ending (orange) databases.  
559 Grey rectangles represent processing steps in construction, which take the content of databases or  
560 output of immediate upstream processing steps as input for processing. Shapes of yellow  
561 documents represent the resulting matrix-like table.

562 **Figure 3.** The scheme of implementation and deployment of EcoFun-MAP. Submissions of  
563 EcoFun-MAP jobs (green background) are handled by a standalone server. Further processing  
564 and execution of the jobs are performed on an HPC cluster.

565 **Figure 4.** Detrended Correspondence Analysis (DCA) of functional gene compositions of  
566 metagenomes from 12 groundwater samples. Analyses of functional gene compositions based on  
567 results from five workflows of EcoFun-MAP are provided. Analysis based on the result from  
568 annotation based on SEED subsystem (boxed by dashed line) is also provided to contrast. Each

569 sample is represented by a distinctive color. Cycles, squares, diamonds and triangles are used for  
570 showing samples from groups of L0, L1, L2 and L3, which are also cycled with green, yellow,  
571 orange and red eclipses, respectively.

572 **Figure 5.** Richness of functional genes in metagenomes from 12 groundwater samples. A total of  
573 six boxplots show the richness of functional genes based on results from five workflows of  
574 EcoFun-MAP, as well as results from annotation based on SEED subsystem (boxed by dashed  
575 line). Boxes in color of green, yellow, orange and red are used for showing richness of functional  
576 genes for samples from groups of L0, L1, L2 and L3, respectively.

577 **Figure 6.** Response ratios of functional genes from comparisons between metagenomes from  
578 contaminated well samples and background well samples. Only significantly ( $p$  value < 0.05 in  
579 ANOVA followed by TukeyHSD) changed genes are included in the plot.

580 **Figure S1.** An example of organization of functional genes in EcoFun-MAP databases.

581 **Figure S2.** An example showing components that constitute a typical keyword query

582 **Figure S3.** Heatmap showing the levels of measurements of environmental factors among 12  
583 groundwater samples. The concentrations of pollutants were scaled to between 0 and 1 for a  
584 better visualization.

585 **Figure S4.** Relative abundances of selected major categories (based on result from Ultra-  
586 conservative workflow) in metagenomes from 12 groundwater samples.

587

588 **Figures**

589 **Figure 1**

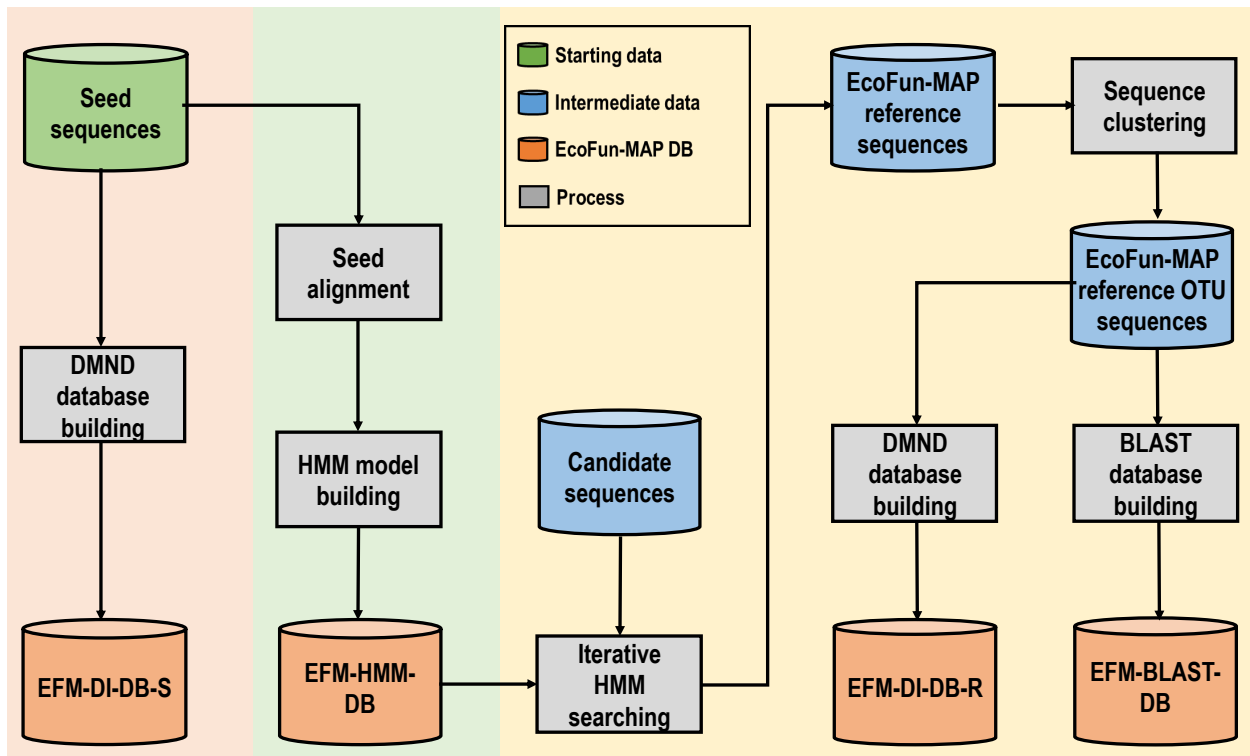

590

591

592

593 **Figure 2**

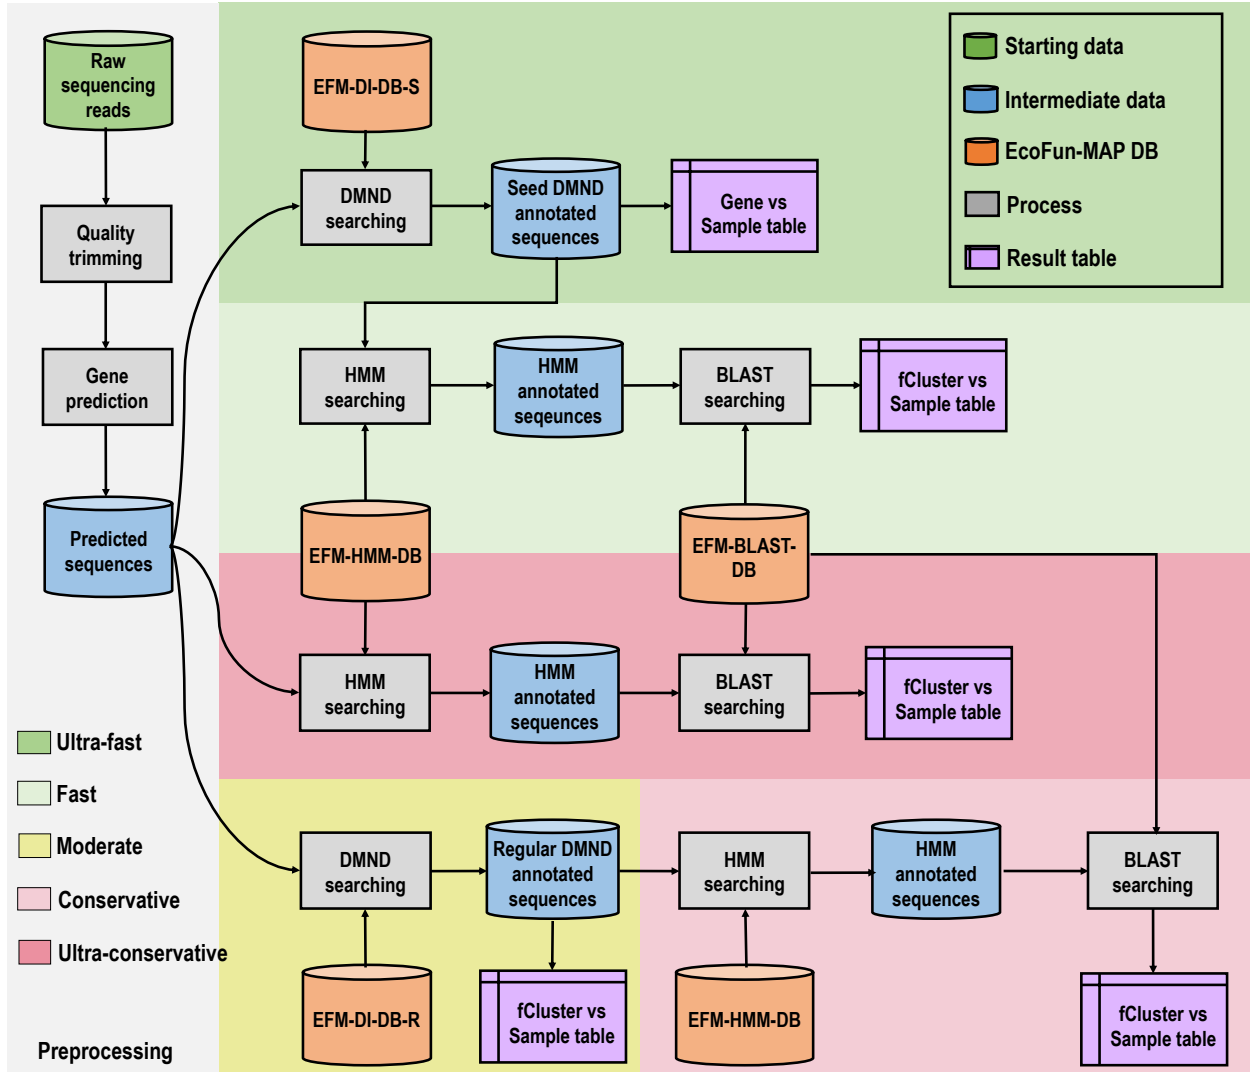

594

595

596

597

598 **Figure 3**

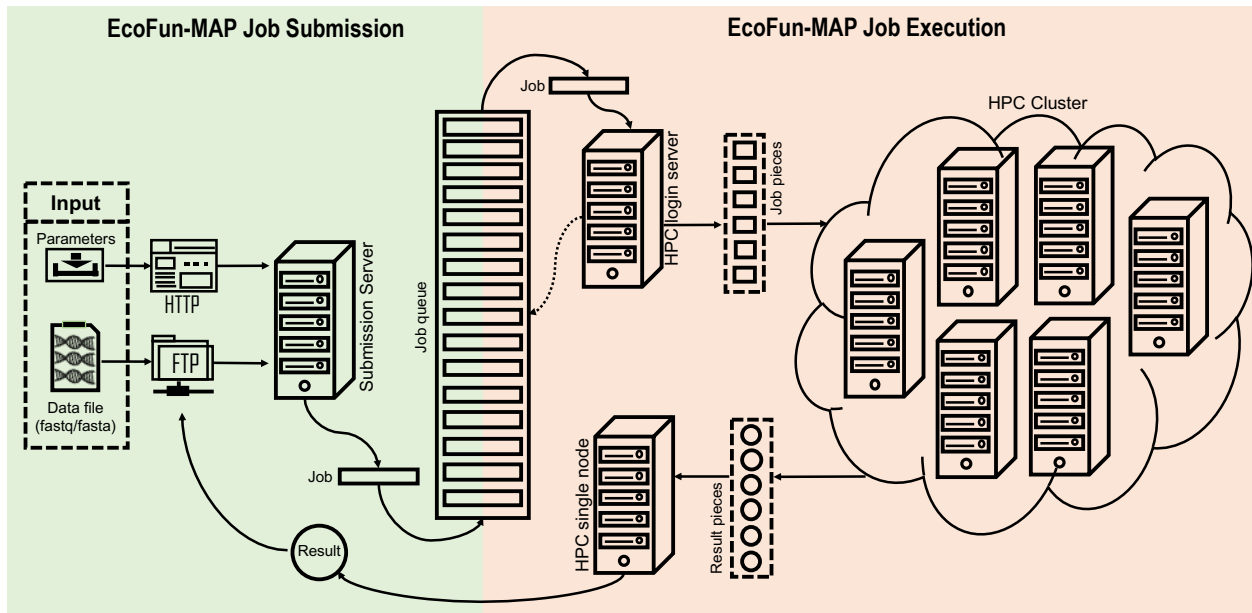

599

600

601 **Figure 4**

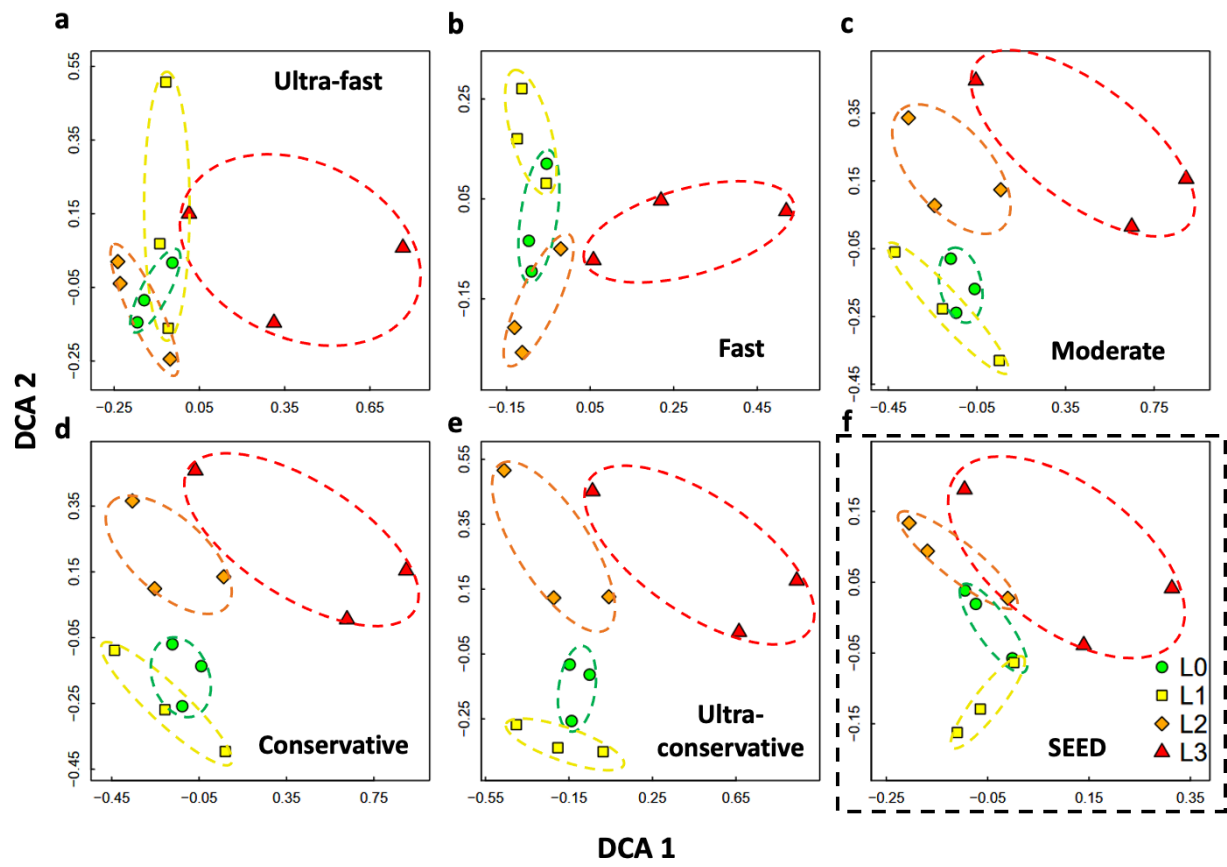

602

603

604 **Figure 5**

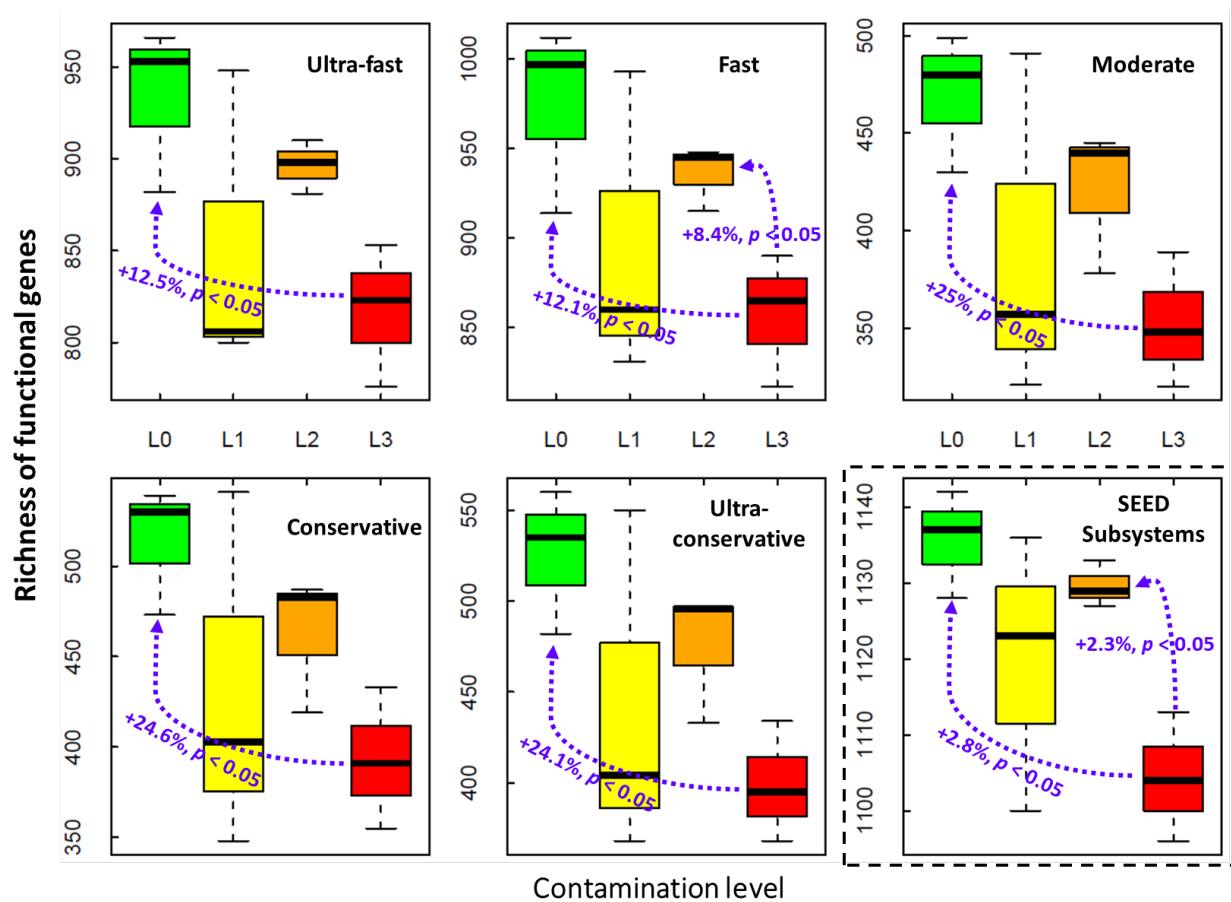

605

606

607



608 **Figure 6**

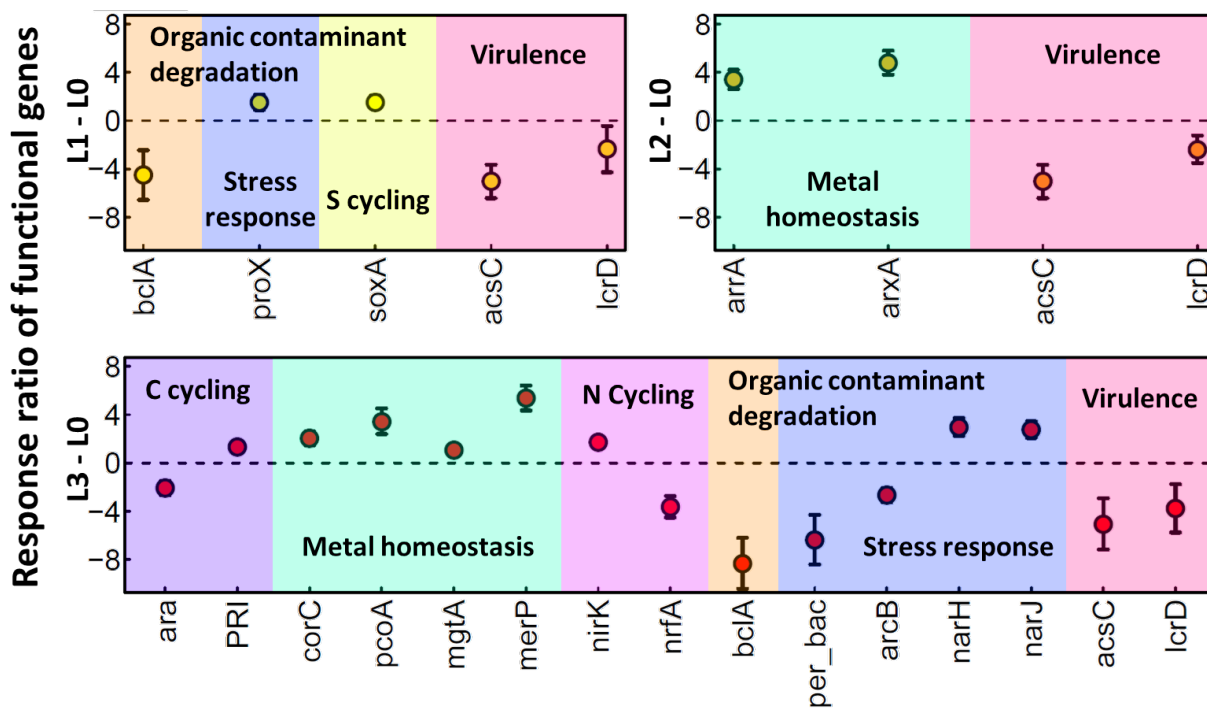

609

610

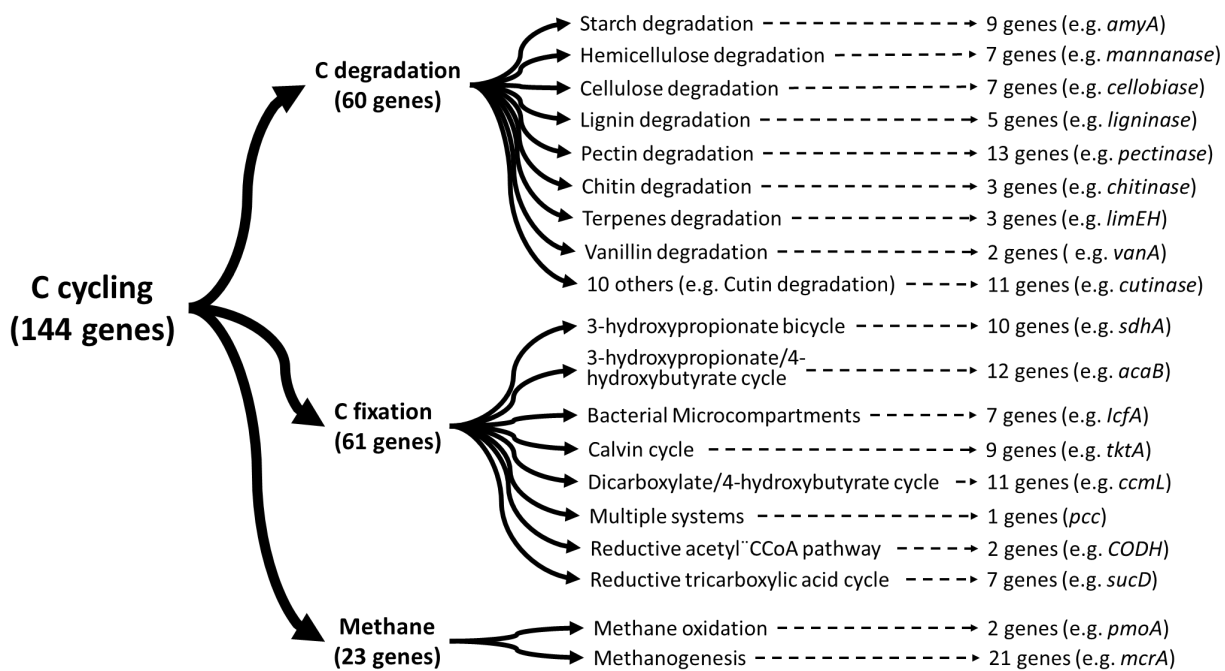

612

613

614 **Figure S2**

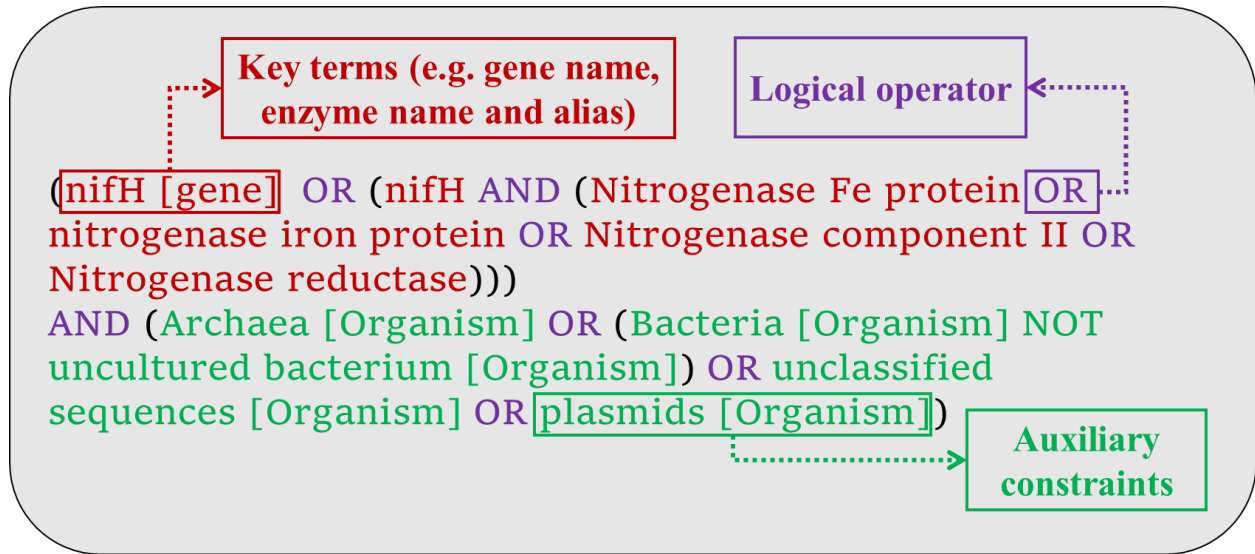

615

616

617 **Figure S3**

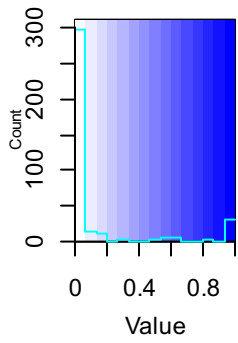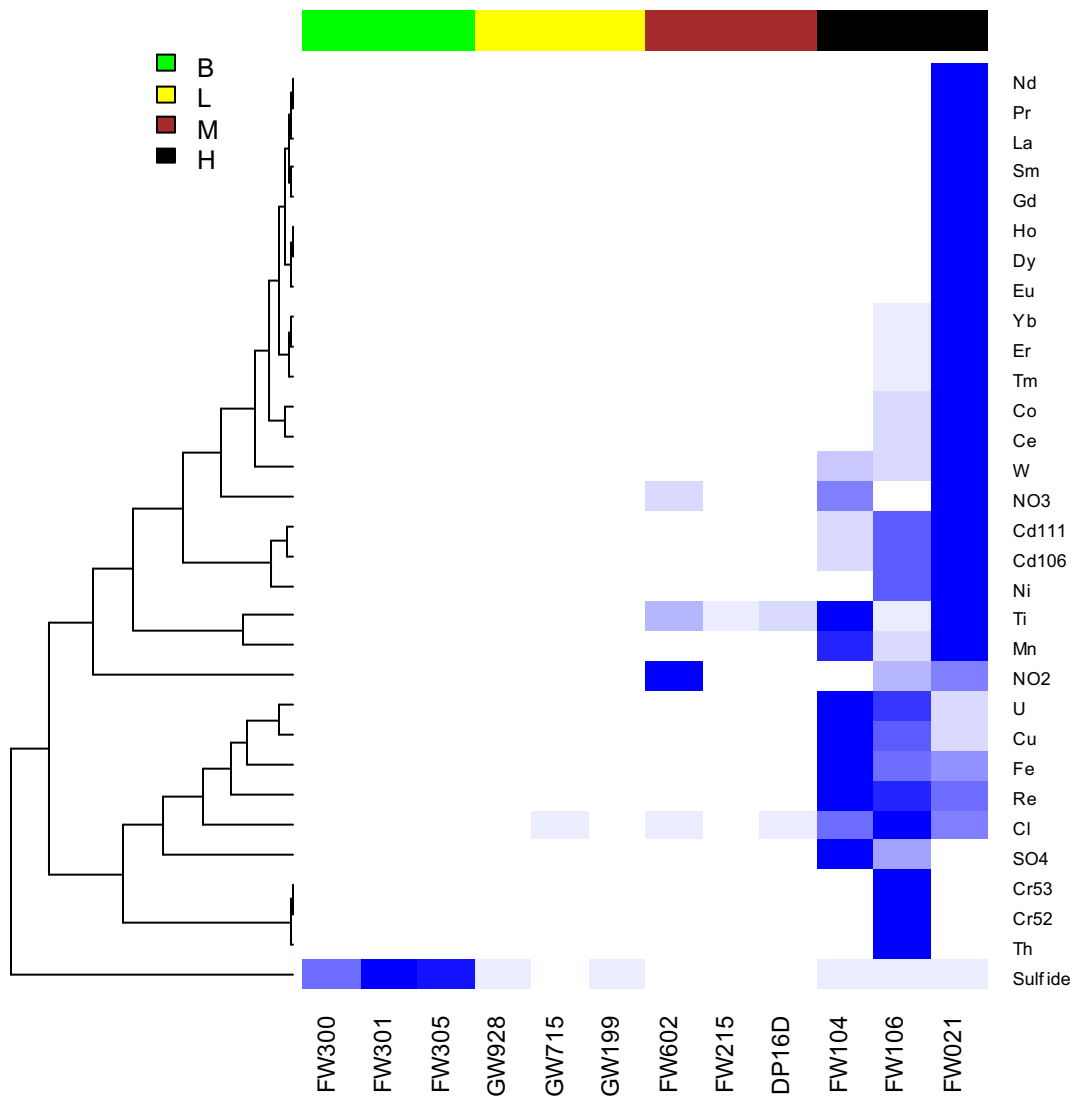

618

619

620 **Figure S4**

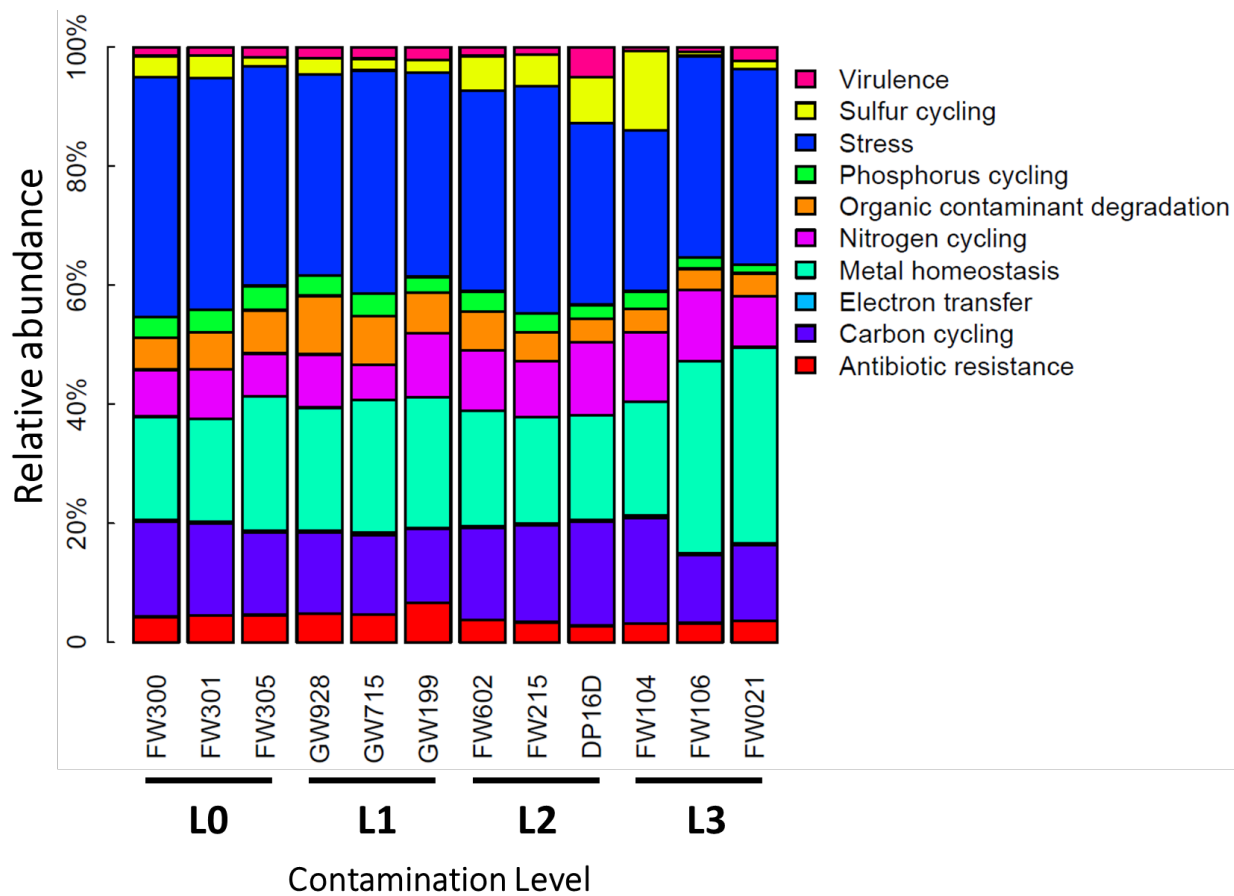

621
